# Supplementary material
Source: publisher figshare collection journal article supplement (https://scielo.figshare.com/ndownloader/files/34723690)
Supplement: Supplementary file 1 [file 34723690]

ASSOCIATION  
of UNIVERSITY  
PRESSES

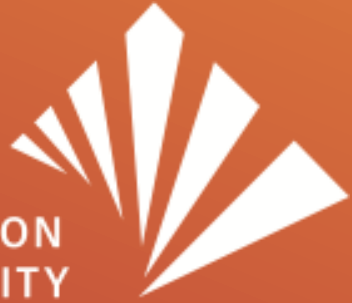

# University Presses and Open Access Books Lessons from SciELO

Charles Watkinson, Director, University of Michigan Press  
President-Elect, Association of University Presses  
[watkinc@umich.edu](mailto:watkinc@umich.edu)

March 31, 2022

AUPresses . . .

advances the essential role of a global community of publishers whose mission is to ensure academic excellence and cultivate knowledge.

Promovemos o função essencial de uma comunidade global de editores cuja missão é garantir a excelência acadêmica e cultivar o conhecimento.

Avanzamos en la consolidación del papel vital de una comunidad global de editores cuya misión es garantizar la excelencia académica y cultivar el conocimiento.

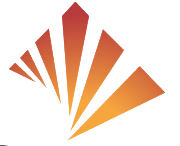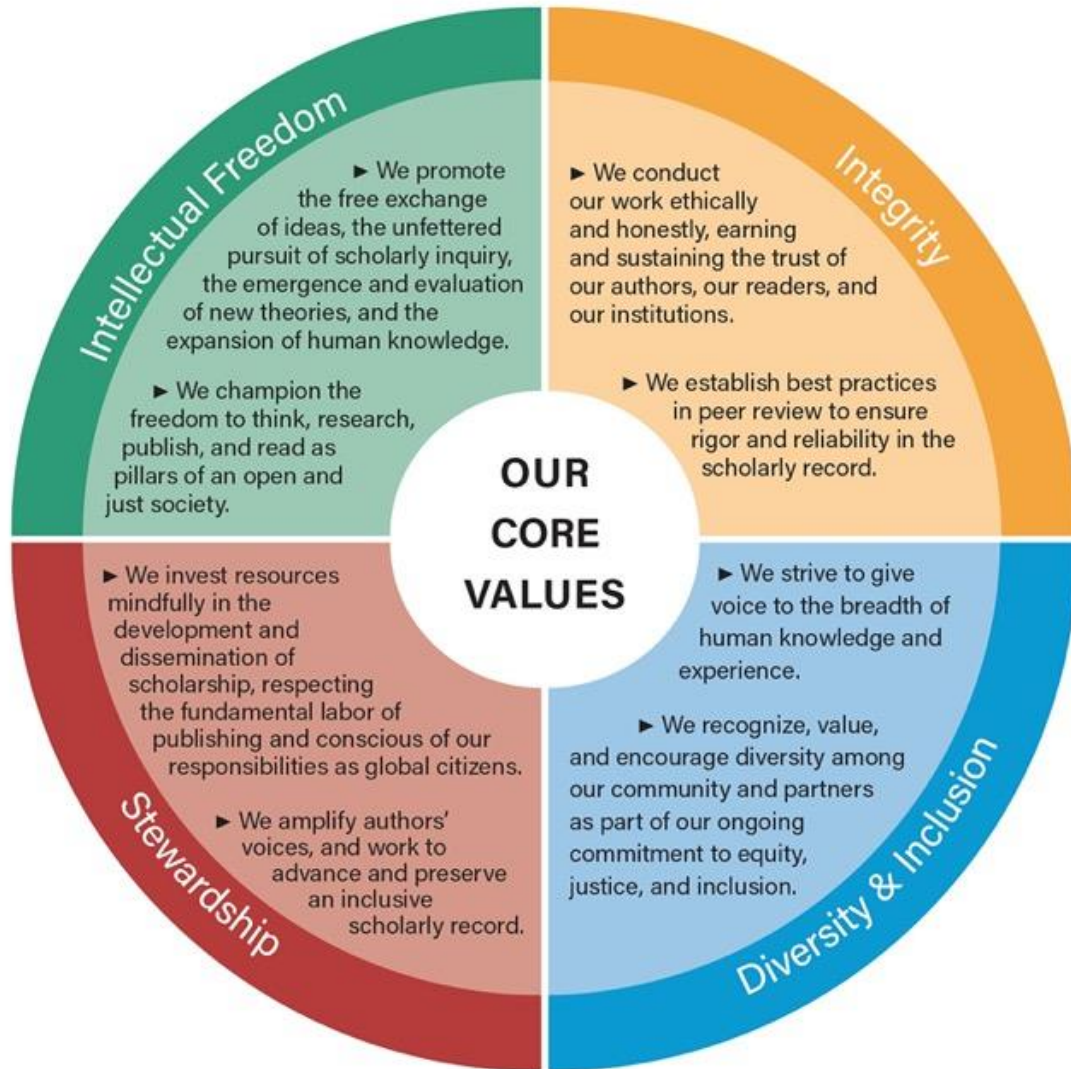

- 158 member presses in 17 countries
  - From Colombia to Denmark, Australia to the West Indies
  - 134 supported by colleges and universities
  - 24 affiliated with institutions other than universities
  - 41 reporting to libraries
- In total, ca. 1,500 journals and 12,000 books a year
- Over 330,000 titles in print
- The majority of members produce < 50 books a year
- Over 60 university presses publish open access books

# **Felicitaciones a SciELO por los 10 años de SciELO Libros**

**from the  
Association of University  
Presses**

**Lisa Bayer, President**

**Peter Berkery, Executive Director**

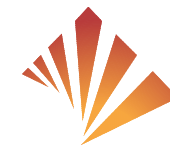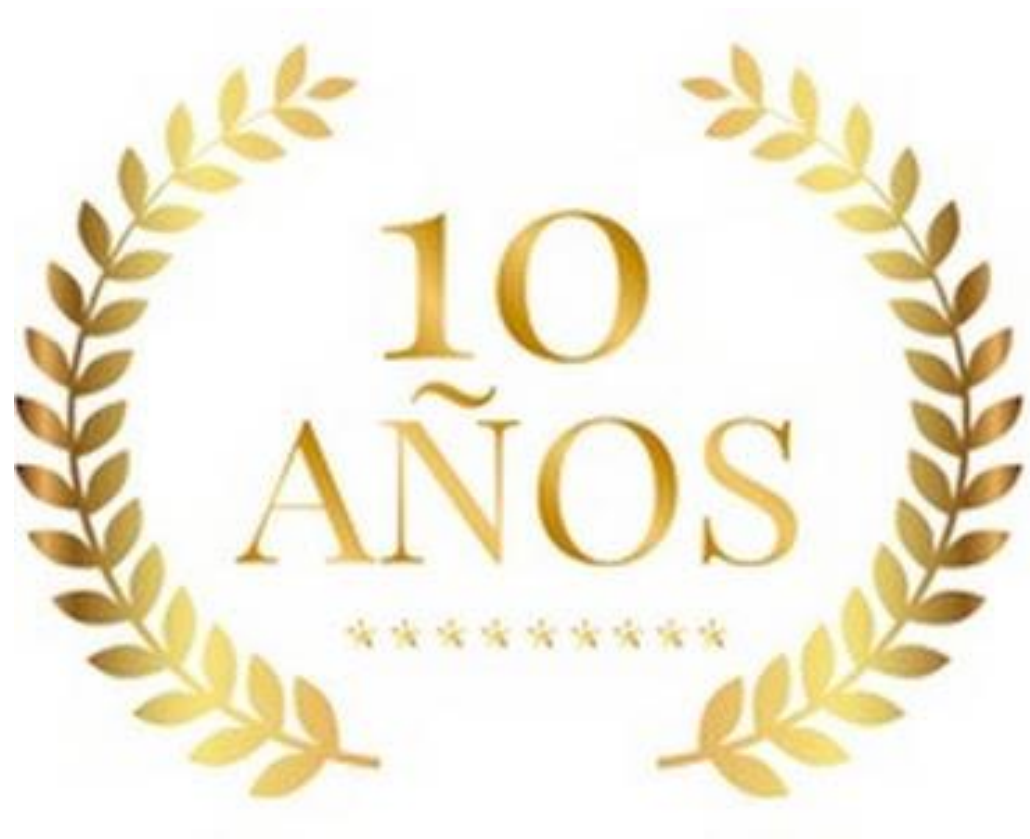

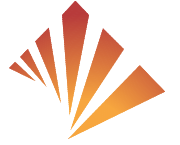

## WHAT DOES AUPRESSES LEARN FROM SCIELO?

- Preserving the regional and linguistic diversity of book publishing matters
- Author-pays models for open access book publishing are not inclusive
- Ensuring that OA books are discovered and rewarded is our shared challenge



# PRESERVING THE REGIONAL AND LINGUISTIC DIVERSITY OF BOOKS MATTERS

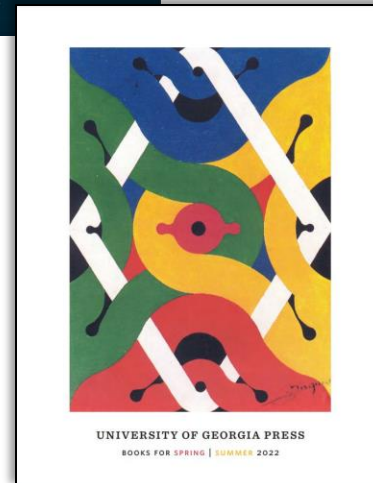

“Our analysis of the 2020 Census results show that the US population is much more multiracial, and more racially and ethnically diverse than what we measured in the past.”

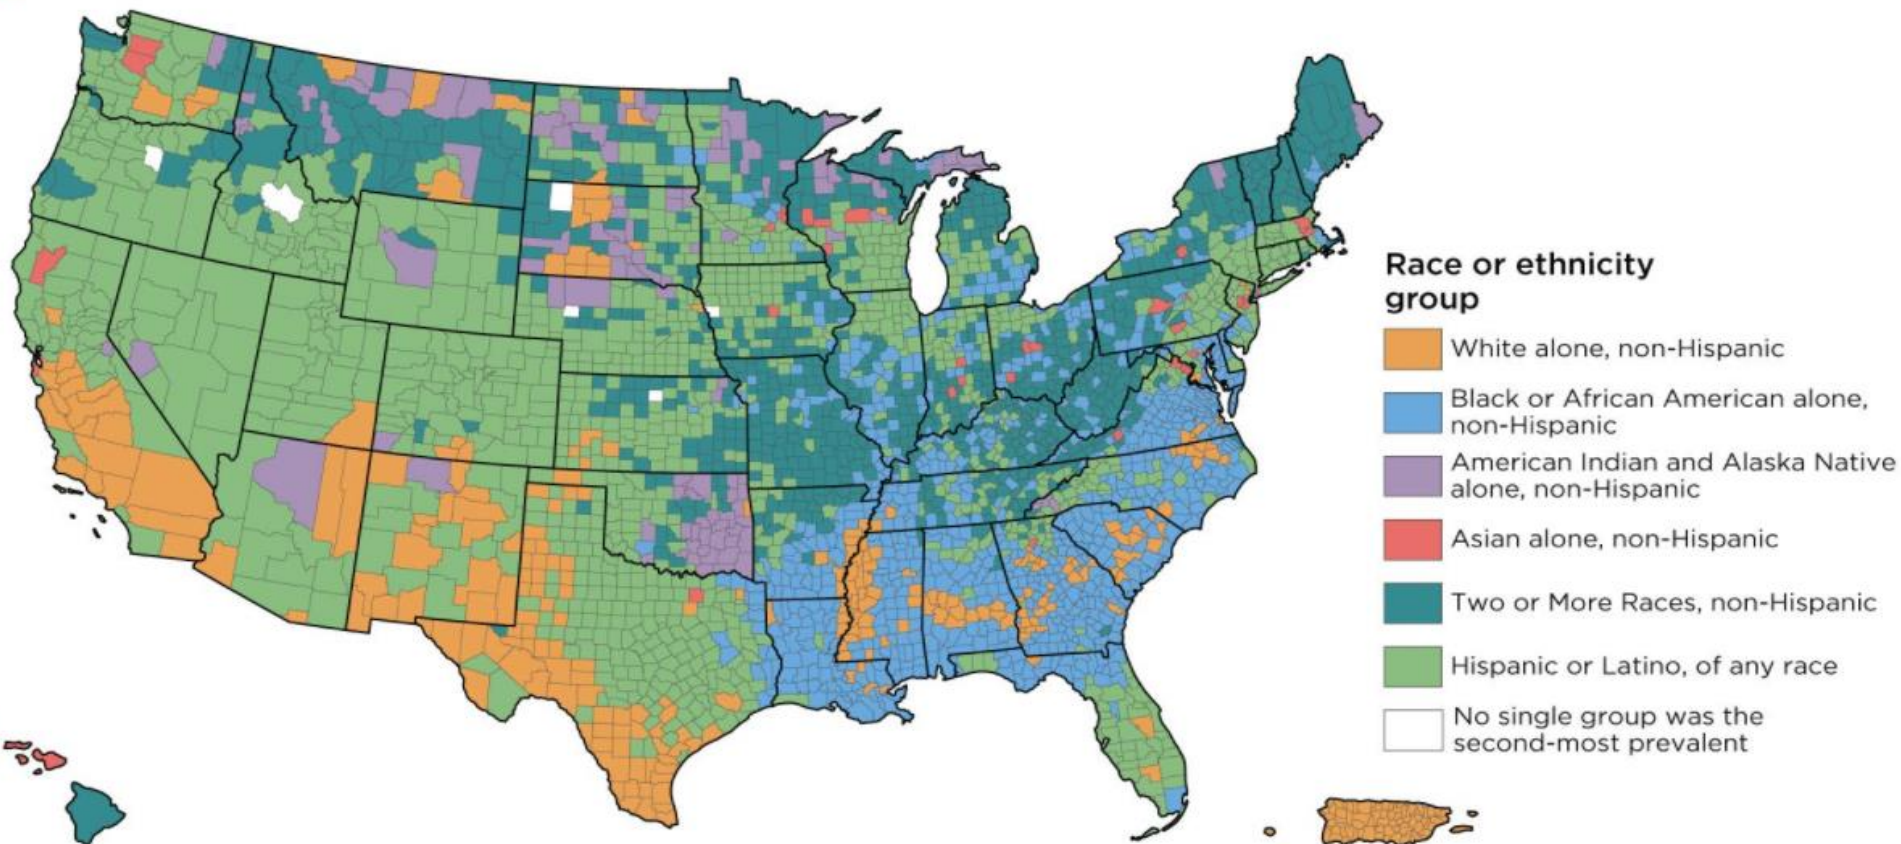

Second-most prevalent race or ethnicity group by county, 2020.

<https://www.census.gov/content/dam/Census/library/stories/2021/08/2020-united-states-population-more-racially-ethnically-diverse-than-2010-figure-3.jpg>



## LESSON LEARNED

# AUTHOR PAYS MODELS FOR OPEN ACCESS BOOK PUBLISHING ARE NOT INCLUSIVE

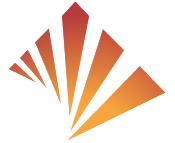

**University of Calgary Press**

Home Books BSPS Open LCR Publishing Authors Instructors & Media About

Current Catalogue

Discover the Catalogue

**Others of My Kind**  
Transatlantic Transcultural  
Collaboration paves a new way

**10 YEARS OF OPEN ACCESS**

**UCL PRESS**

Home Books Journals Publish with us Resources Statistics About us UCL Research Collections

The UK's first fully open access university press.

Launched in 2015, UCL Press has quickly established itself as a high-quality open access university press. We have published more than 200 open access books, and also publish 14 open access journals. Find out more about what else we do.

FIND OUT MORE

Latest publications

**THE COVERT LIFE OF HOSPITAL ARCHITECTURE**  
JULIE DUNN AND ROBERT DUNN

**HERITAGE AND NATIONALISM**  
DAVID DUNN

**Impermanence**  
DAVID DUNN

**Panopticon versus Now**  
DAVID DUNN

**Material Culture and the Future**  
DAVID DUNN

**Athabasca University Press**

Open, original scholarship

Athabasca University Press

AU Press is committed to making research and scholarship freely accessible through the publication of books and journals in open access. Our unique publishing model offers authors the opportunity to reach a wide readership and creates an innovative forum for the exchange of ideas.

Search all by title, author, subject

2022 SPRING CATALOGUE

**AU PRESS**  
SPRING 2022

**The National Academies Press**

The National Academies Press (NAP) publishes the reports of the National Academies of Sciences, Engineering, and Medicine. The NAP publishes more than 200 books a year on a wide range of topics in science, engineering, and medicine, authoritative, independently-researched information on important matters in science and health policy.

HOME NEW RELEASES BROWSE BY DIVISION BROWSE BY TOPIC SEARCHABLE COLLECTIONS

**Video Game Art Reader: Volume 4**  
Edited by Tiffany Funk and Michael Reed  
Volume 4 of the Video Game Art Reader proposes overlocking as a metaphor for how games are produced and experienced today, and the temporal compressions and expansions of the many historical lineages that have shaped game art and culture.

Read free online Buy

**Netprov: Networked Improvised Literature for the Classroom and Beyond**  
Rob Wittig  
In this accessible history of Netprov, an emerging interdisciplinary digital art form that offers a literature-based "show" of insightful, healing satire that is as deep as the novels of the past, Rob Wittig describes a literary genre in which all the world is a platform and all participants are players.

Read free online Buy

Read more books...

**Featured Titles**

**Reckoning with the U.S. Role in Global Ocean Plastic Waste**  
DAVID DUNN

**Pathways to Discovery in Astronomy and Astrophysics**  
DAVID DUNN

**Transforming Trajectories for Women of Color in Tech**  
DAVID DUNN

**The Future 2030: Characterizing the World We Want**  
DAVID DUNN

**Digital First. Open Access. Peer Reviewed. We produce pathbreaking scholarship with a liberal arts ethos and make it available to readers everywhere as digital, open-access work.**

Explore our Catalog



UNIVERSITY OF MICHIGAN PRESS

EBOOK COLLECTION

Search and discover books

BROWSE BOOKS

HELP

ABOUT

IMPLEMENT THE COLLECTION

INVEST IN OPEN ACCESS

ADVANCE SOCIAL IMPACT

Fund to Mission

The University of Michigan Press Ebook Collection is transitioning to an open access monograph model termed Fund to Mission.

Learn More

Our Books

The University of Michigan Press Ebook Collection contains thousands of the finest humanities and social sciences monographs.

Explore List

Through its ebook collection, U-M Press partners with libraries to support faculty public engagement, catalyze academic innovation, and advance more equitable access to information.

Explore the Collection

OPENING

the Future

Home

Sign Up

About

News

FAQ

Resources

OA Progress

Supporters

Contact

Opening the Future: A New Model for Open Access Books

Sign up to subscribe as a member

Watch our 40 second explanation video

Sign Up

History Package

History of the former communist countries is a strong feature of CEU Press's publication program and this premier collection of books covers topics from medieval times to the fall of communism. Title...

Political Science Package

Interest in Central and Eastern Europe over the past 30 years has been intense. The region experienced political, economic, social and cultural changes on a scale not seen elsewhere. This scholarly c...

Editors' Choice Package

For those libraries that would like to acquire a broad selection of books about the region covering its literature, history, economics and culture. This package includes issue-focussed books in gende...

Library Selection

This package contains 50 books selected by an independent panel of librarians. This selection is a cross-section of the other three packages and represents those CEU Press titles that might be of int...

The Sustainable History Monograph Pilot

Opening up the Past, Publishing for the Future

Sustainable History Monograph Pilot

The Sustainable History Monograph Pilot (SHMP) is a Mellon-funded initiative to publish open digital editions of high-quality books from university presses in the field of history. Unlike other Open Access (OA) pilots, SHMP transforms the publishing process and outputs, while focusing on a single academic discipline. More information about the initiative can be found at: <https://longleafservices.org/blog/the-sustainable-history-monograph-pilot/>

More...

ABOUT

COLLECTION

43 RESULTS

A B C D E F G H I J K L M N O P Q R S T U V W X Y Z

Search this Collection

SORT BY

VIEWS

TITLE

DATE PUBLISHED

CREATOR

Metadata

Text contents

Part Of

eBooks and Texts

Media Type

texts

43

Year

2022

2021

2020

2019

In the Service of God and Humanity: Conscience, Reason, and the Mind of Martin G. Delany

Tunde Adenike

IN THE SERVICE OF GOD AND HUMANITY: by ADOLPHUS TUNDE

6

20

14

1

A Civil Society: The Public Space of Freemason Women in France, 1744-1944

James Smith Adams

CIVIL SOCIETY: the public space of freemason

4

1

0

Augustus Hopkins Strong and the Struggle to Reconcile Christian Theology with Modern Thought

John Abid

Augustus Hopkins Strong and the Struggle to

34

0

0

The CIA in Ecuador

Marc Becker

The CIA in Ecuador

154

5

0

Turning toward Edification: Foreigners in Chosŏn Korea

Adam Schuch

Turning toward edification: Foreigners in Chosŏn

44

1

0

Library Subscribe to Open

Title Subventions

Parent Institutional Support

Sales of Print

Direct to Open

A New, Collective Action Open Access Business Model for Scholarly Books

Direct to Open harnesses collective action to support open access to excellent scholarship. Developed over two years with the generous support of the Arcadia Fund, in close collaboration with the library community, the model will:

Open access to all new MIT Press scholarly monographs and edited collections (~90 titles per year) from 2022 via recurring participation fees.

Provide participating libraries with term access to backlist/archives (~2,300 titles), which will otherwise remain gated. Participating libraries will receive access even if the model is not successful.

Cover partial direct costs for the publication of high-quality works that are also available for print purchase.

Commit by June 30, 2022

By participating in Direct to Open, libraries have an opportunity to shift from buying digital monographs from the MIT Press once for a single collection to funding them "once for the world." Together, we can make knowledge more open and accessible. Libraries must commit by June 30, 2022, to receive exclusive participation benefits.

Contact Us with Questions >>

Request More Information >>

Become a Participating Institution >>

Toward an Open Monograph Ecosystem

Discover research from Toward an Open Monograph Ecosystem (TOME)

+ Follow

ALL

CATEGORIES

INSTITUTIONS

SEARCH

sort by: Publication date

Eco Soma: Pain and Joy in Speculative Performance ...

Book published on 14.03.2022

Petra Kuppers

Early Modern Herbs and the Book Trade: English Stationers ...

Book published on 05.01.2022

Sarah Neville

Hajj to the Heart: Sufi Journeys across the Indian Ocean

Book published on 27.12.2021

Scott Kugle

Radiation Sounds: Marshallese Music and Nuclear Silences

Book published on 18.11.2021

Jessica Schwartz

About

Features

Tools

Blog

Ambassadors

Contact

FAQs

Privacy Policy

Cookie Policy

T&Cs

Disclaimer

Sitemap

Home

Books

For Authors

For Libraries

Why OA

FAQs

Blog

Email Updates

Search books...

Open to the World

UC Press Luminos

The evolution of monograph publishing

Luminos is University of California Press's Open Access publishing program for monographs. With the same high standards for selection, peer review, production and marketing as our traditional program, Luminos is a transformative model, built as a partnership where costs and benefits are shared.

Featured Books

INK-STAINED HOLLYWOOD

ERIC HOYT

The Practice of Texts

ANTHONY CERULLI

HUIZHOU

QITAO GUO

CINEMATIC INDEPENDENCE

SHAN TONG

ACCIDENTAL HOLY LAND

JOSEPH W. KUBICKI

Acquired Alterity

Michaela M. M. M.

ALL BOOKS



# ENSURING THAT OPEN ACCESS BOOKS ARE DISCOVERED AND REWARDED IS OUR SHARED CHALLENGE

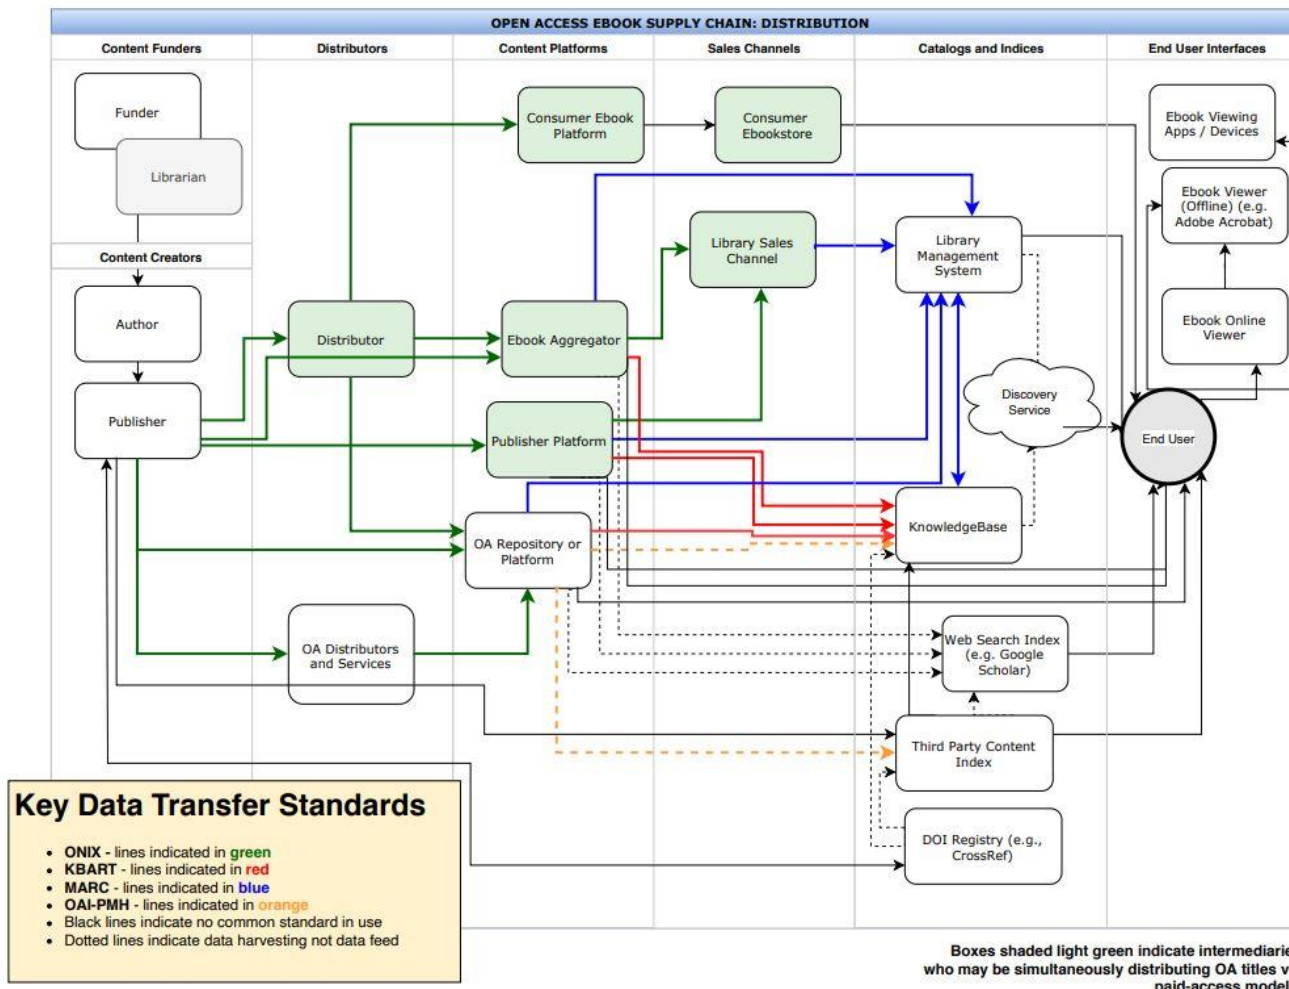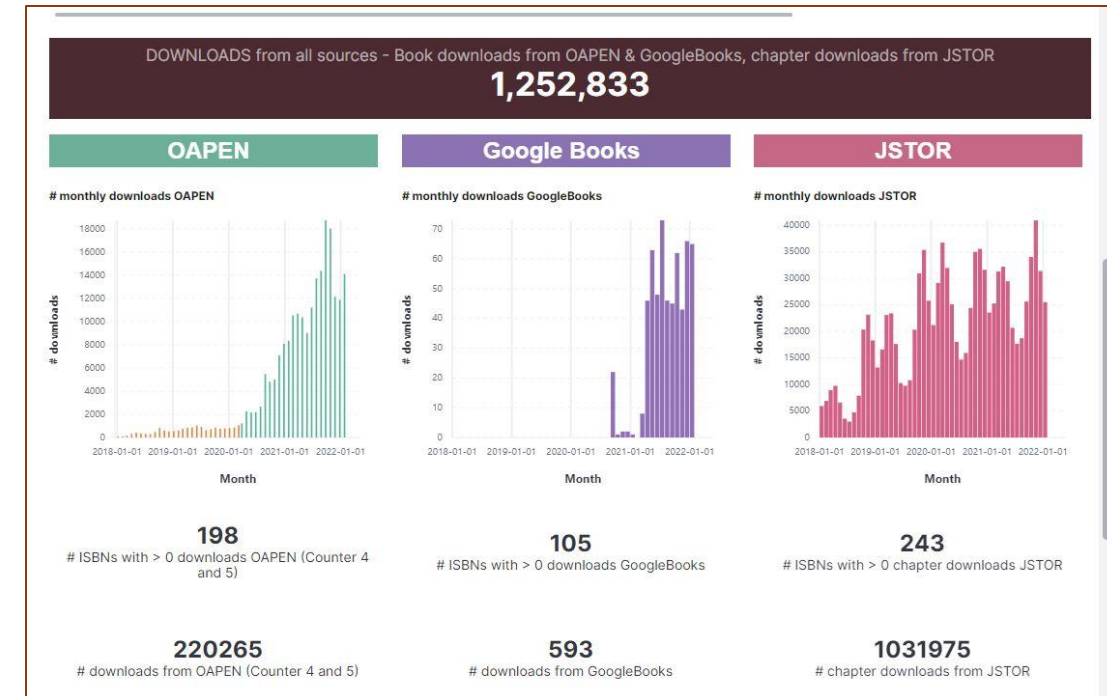

<https://ebc.press.umich.edu/impact/#oa-book-usage>

Clarke, Michael, & Ricci, Laura. (2021). "Open Access eBook Supply Chain Maps for Distribution and Usage Reporting." Zenodo. <https://doi.org/10.5281/zenodo.4681871>



Manifold

Features Community Services Docs **Get Started** v 6.0.0

There's room for everything that doesn't make it into the book.

Scholarship is a process, not a product. Gather and share your work—even while you work—with Manifold. Research materials, rich media, interviews, raw data, drafts, notes all have a home here.

Block Lives Matter August Statistics

33,267 selected out of 33,267 records | Reset All

Hashtag Frequency

Hashtag Frequency/Time chart

Retweeted vs Original Tweets

Day of Week

Interactive BLM social media activity

<https://manifoldapp.org/> (University of Minnesota Press)

Lever Press

Search works

About Books Series Publish With Us Join Us Impact News Events

Search and Browse Books

« Previous | 1 - 15 of 17 | Next »

Sort by Publication Date (Newest First) 15 per page

Access

- All content
- Only content I can access
- Only open access content

Funder

Subject

Author

Series

Legend

Casa Pueblo: A Puerto Rican Model of Self-Governance

Alexis Massol González, author, translated by Ashwin Ravikumar and Paul Schroeder Rodríguez

2022

Culture & Content in French: Frameworks for Innovative Curricula

Edited by Aurélie Chevant-Aksoy and Kathrynne Adair Corbin

2022

Women of Trachis

Sophokles, Rachel Kitzinger and Eamon Grennan

2021

<https://www.fulcrum.org/> (University of Michigan Press)

RavenSpace

HOME PUBLISH WITH US PUBLICATIONS ABOUT US CONTACT US

AS I REMEMBER IT

Teachings (ᑭᓄᓄᓄᓄᓄᓄ) from the Life of a Sliammon Elder

Elsie Paul, with Davis McKenzie, Paige Raibmon, and Harmony Johnson

"eloquent and powerful."

— Susan Roy, Department of History, University of Waterloo

Available Now

INSTITUTIONAL LOGIN

PROJECT MUSE

BROWSE OR Search...

ACCESSIBILITY LOG IN

MENU

Open Access Content Results

Sort By Newest First

Movements After Revolution: A History of People's Struggles in Mexico

Miles V. Rodríguez

Oxford University Press

Book

View Save

Slavery in the Circuit of Sugar, Second Edition: Martinique and the World-Economy, 1830-1848

Tomich, Dale W.

State University of New York Press

Book

View Save

11

<https://ravenspacepublishing.org/> (UBC and U of Washington Presses)

<https://muse.jhu.edu/> (Johns Hopkins University Press)



“

It is an exciting time for OA monographs. But the landscape can appear confusing to libraries and authors. The next year will be crucial in terms of mandates and models. What we cannot do, at this point, is throw our hands up and say that everything is too complicated and do nothing. Without investment in pilots and without author engagement, we will reach a bad place. We will reach a world where all scientific work is free to read by the public, but all humanities work is prohibitively expensive. We must avoid this elitist world at all costs.

”

Martin Eve, Birkbeck College, and Anthony Cond, Liverpool University Press (2021)  
<https://www.researchinformation.info/analysis-opinion/crucial-time-oa-monographs>
